# Supplementary material for: Photocatalytic and magnetic porous cellulose macrospheres for water purification
Source: Springer Nature journal article supplement (doi:10.1007/s10570-019-02401-4), 2019-04-02
Supplement: MOESM1 [file 16592448]

*Supplementary Information*

**Photocatalytic and magnetic porous cellulose macrospheres for water purification**

*Alexandra S. M. Wittmara,b*, Qian Fua,b and Mathias Ulbrichta,b*

aLehrstuhl für Technische Chemie II, Universität Duisburg-Essen,

Universitätsstr. 7, 45141 Essen, Germany

bCENIDE – Center for Nanointegration Duisburg-Essen, NETZ – Nano Energie Technik Zentrum, Carl-Benz Str. 199, 47057 Duisburg, Germany

*Corresponding author: Fax: +49 – 201 – 183 3147, e-mail: [alexandra.wittmar@uni-due.de](mailto:alexandra.wittmar@uni-due.de);


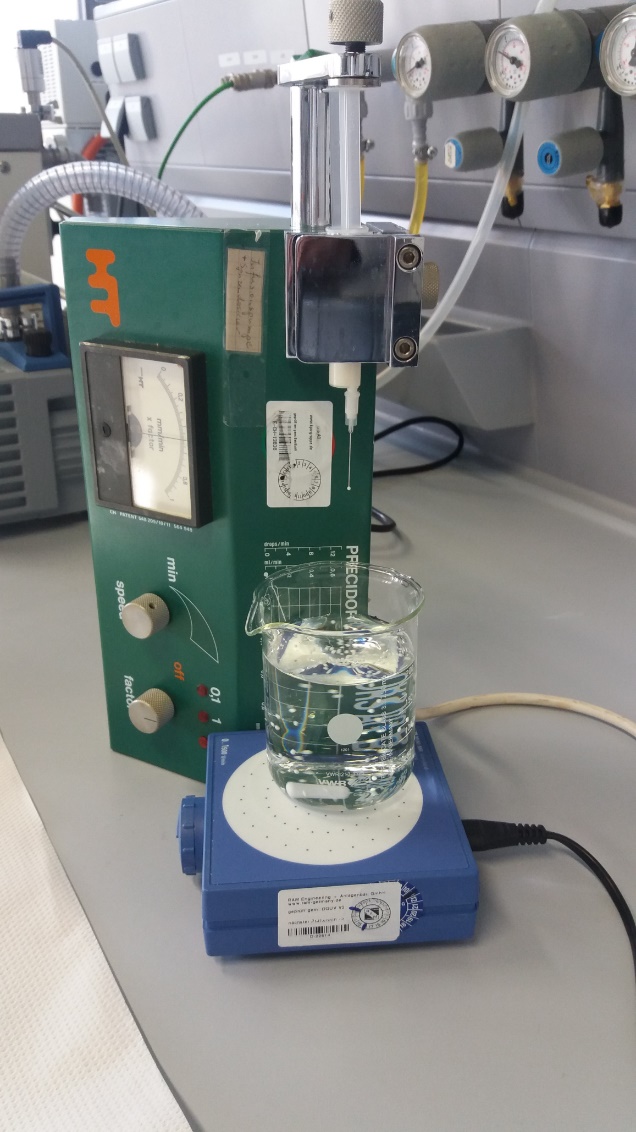


Figure SI-1. Dropping *cum* phase separation by an automatic syringe pump


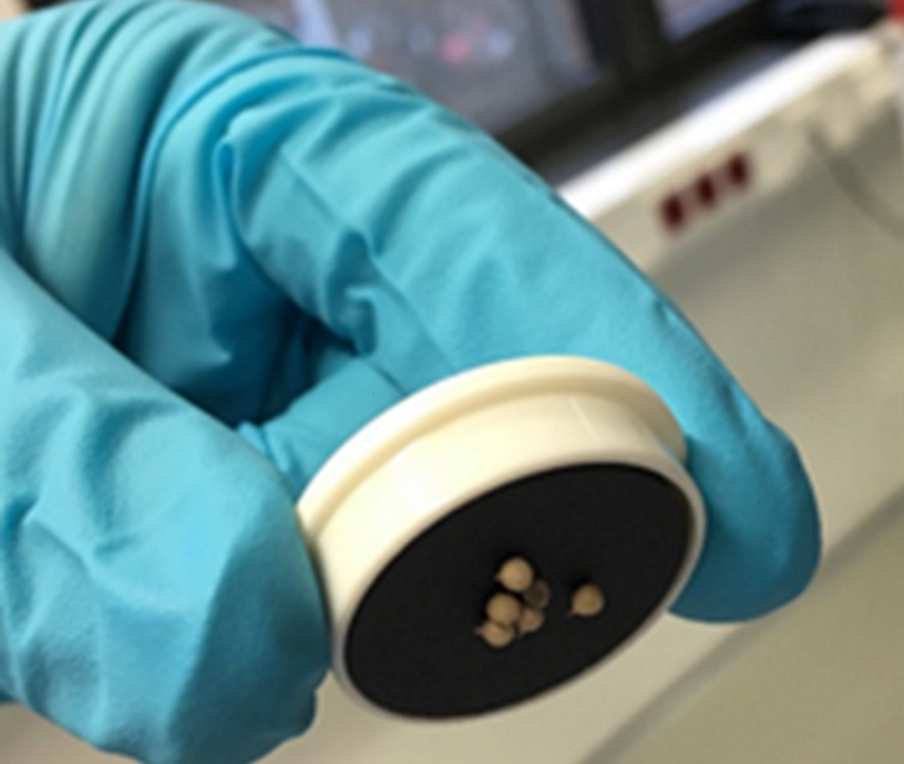


Figure SI-2. Magnetic cellulose-based macrospheres doped with TiO2 and Fe3O4


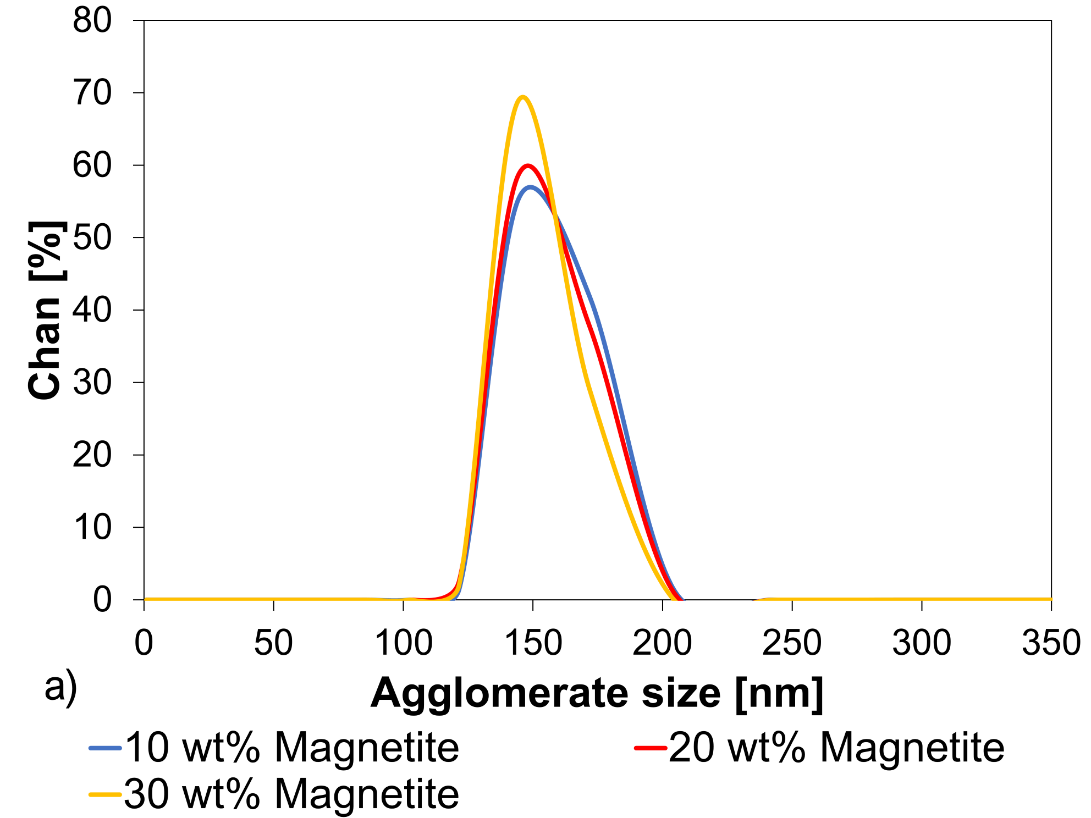

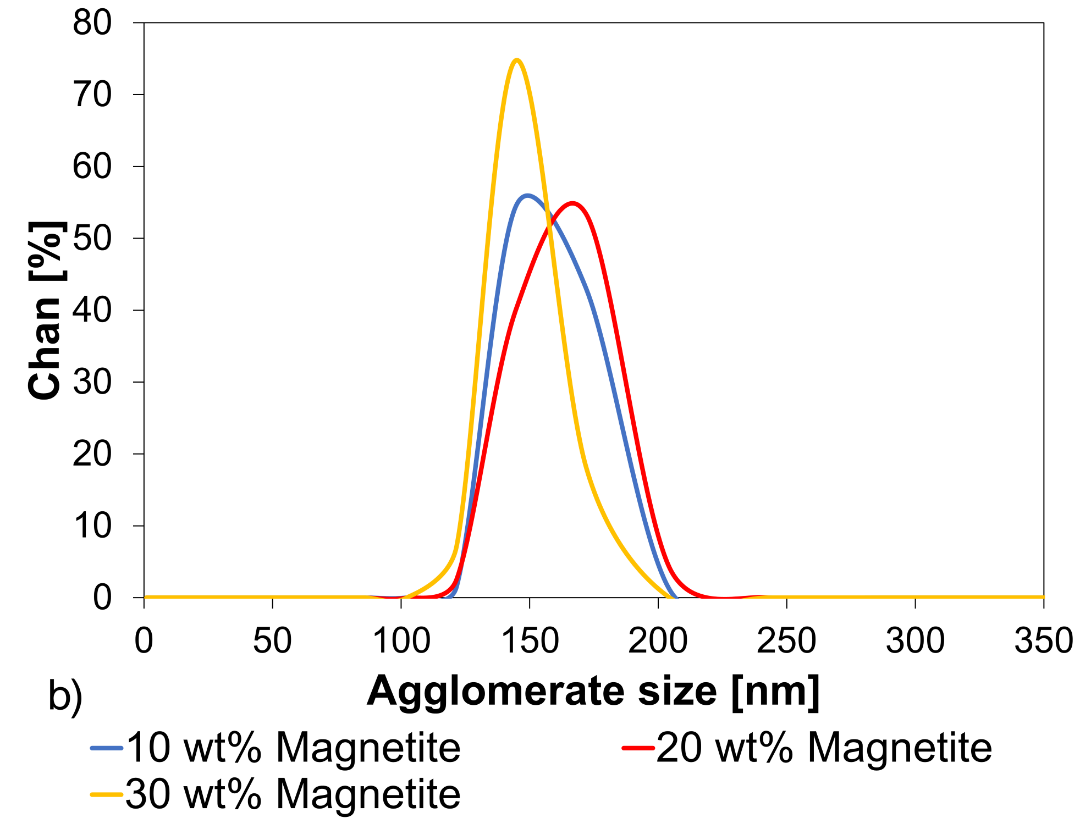


Figure SI-3. Magnetite agglomerate size distribution in dispersions in [Bmim][OAc]:DMSO = 3:1; 10 wt%, 20 wt% or 30 wt% nanoparticles: a) distribution by number; b) distribution by intensity


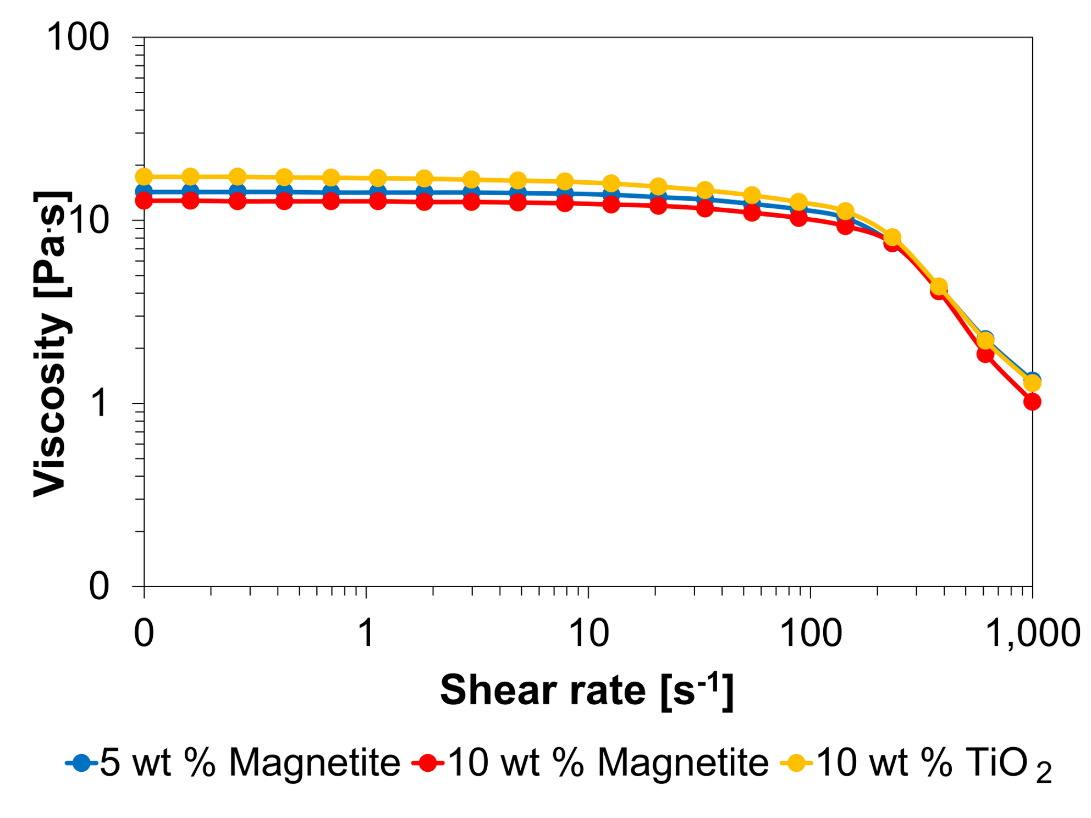


Figure SI-4. Influence of the nanoparticle type and concentration on the rheological properties of the 6 wt% cellulose solutions in [Bmim][DMSO] = 3:1


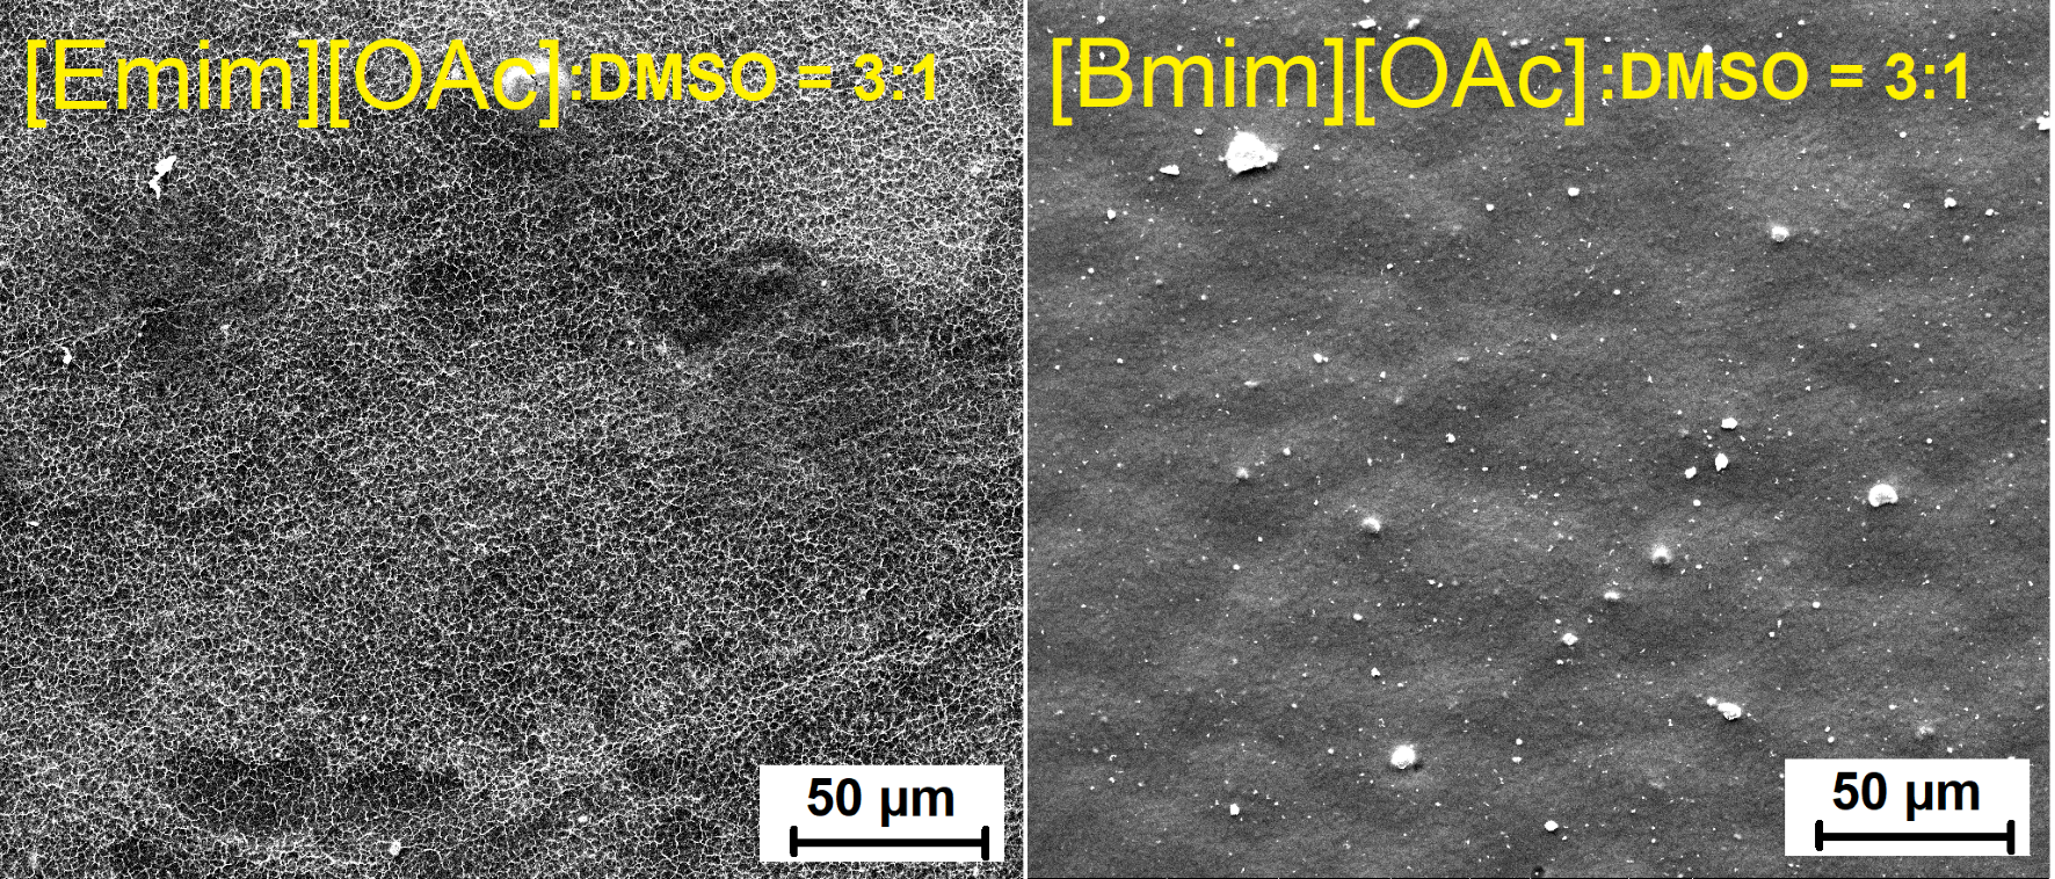


Figure SI-5. The presence of nanoparticles at the surface of cellulose-based nanocomposites prepared from two different ionic liquids-based polymer solutions
